# Supplementary material for: Long-distance proton transfer induced by a single ammonia molecule: ion mobility mass spectrometry of protonated benzocaine reacted with NH3
Source: Royal Society of Chemistry journal article supplement (doi:10.1039/c9cp06923b), 2020-01-01
Supplement: c9cp06923b1.pdf [file c9cp06923b1.pdf]

## Electronic Supplementary Information

### **Long-distance proton transfer induced by a single ammonia molecule: ion mobility mass spectrometry of protonated benzocaine reacted with NH<sub>3</sub>**

Keijiro Ohshimo, Shun Miyazaki, Keigo Hattori, Fuminori Misaizu\*

*Department of Chemistry, Graduate School of Science, Tohoku University, 6-3 Aoba, Aramaki, Aoba-ku, Sendai 980-8578, Japan*

\*Corresponding author: misaizu@tohoku.ac.jp (F. Misaizu)

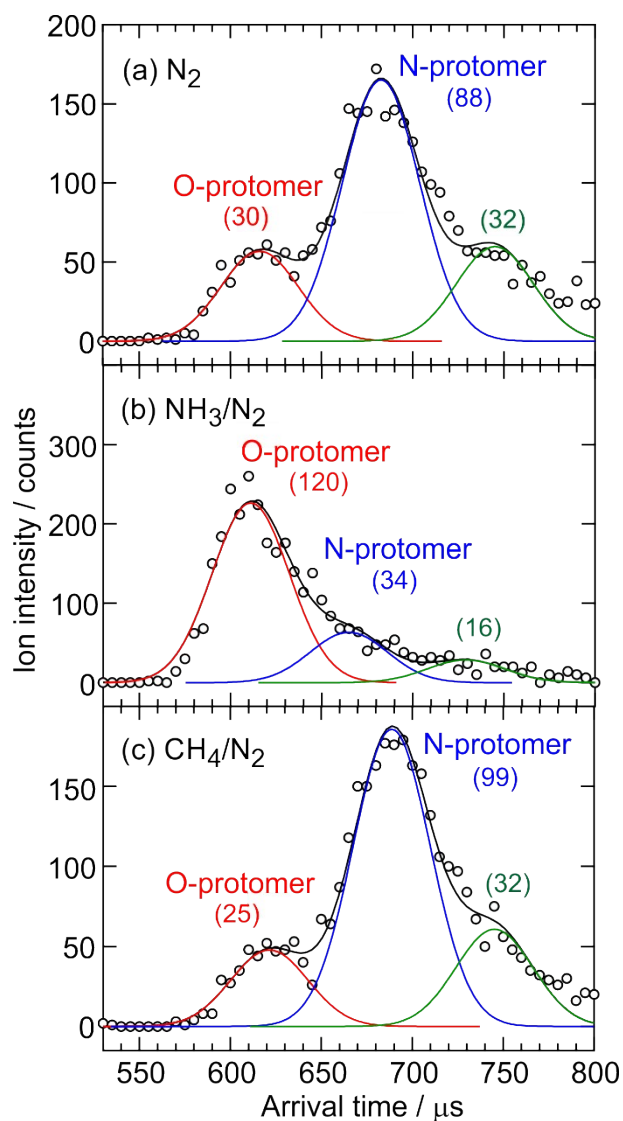

**Fig. S1** Arrival time distributions of  $\text{BC}\cdot\text{H}^+$ . (a)  $\text{N}_2$  buffer gas in the ion drift tube (Pressure in the drift tube  $P_{\text{DT}} = 0.11$  Torr), (b) 0.5%  $\text{NH}_3/\text{N}_2$  buffer gas ( $P_{\text{DT}} = 0.10$  Torr), (c) 1%  $\text{CH}_4/\text{N}_2$  buffer gas ( $P_{\text{DT}} = 0.11$  Torr). Red, blue and green curves are Gaussian functions for fitting the experimental plots (black circles). Red, blue and green curves represent the O-protomer, N-protomer, and  $\text{BC}\cdot\text{H}^+$  fragments caused by the dissociation of acetonitrile-solvated N-protomers. Each area of bands with red, blue and green curves is shown in parenthesis.

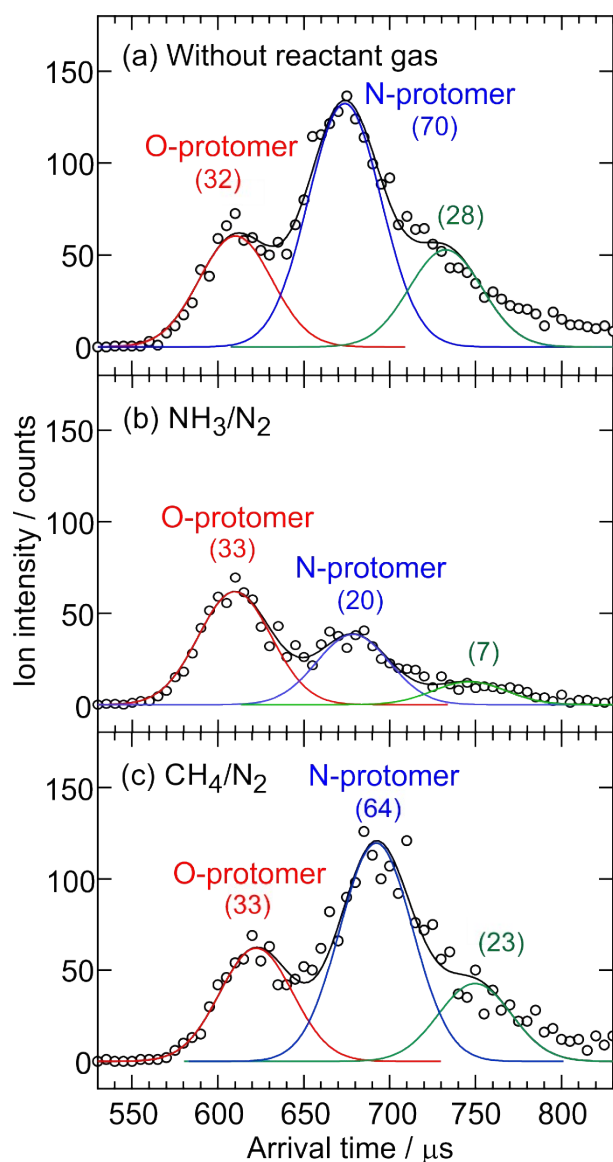

**Fig. S2** Arrival time distributions of  $\text{BC}\cdot\text{H}^+$ . (a) Without reactant gas in the ion guide, (b) 20%  $\text{NH}_3/\text{N}_2$  gas in the ion guide ( $\Delta P = 3.1 \times 10^{-3}$  Pa), (c) 20%  $\text{CH}_4/\text{N}_2$  gas in the ion guide ( $\Delta P = 3.0 \times 10^{-3}$  Pa). The pressure of  $\text{N}_2$  buffer gas in the ion drift tube was  $P_{\text{DT}} = 0.11$  Torr. Red, blue and green curves are Gaussian functions for fitting the experimental plots (black circles). Red, blue and green curves represent the O-protomer, N-protomer, and  $\text{BC}\cdot\text{H}^+$  fragments caused by the dissociation of acetonitrile-solvated N-protomers. Each area of bands with red, blue and green curves is shown in parenthesis.

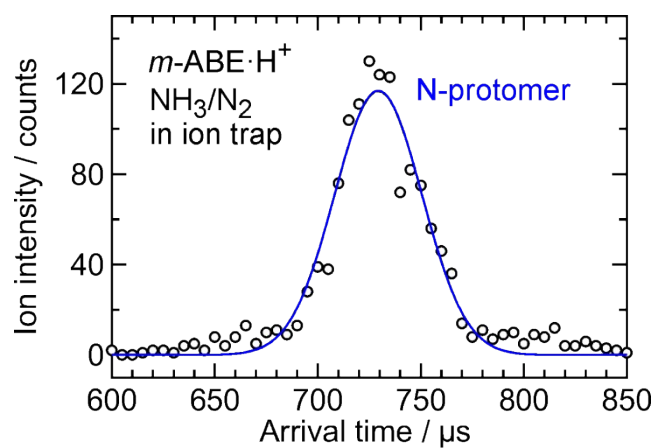

**Fig. S3** Arrival time distributions of  $m\text{-ABE}\cdot\text{H}^+$  with 1%  $\text{NH}_3/\text{N}_2$  gas in the ion trap. The partial pressure of  $\text{NH}_3/\text{N}_2$  gas ( $\Delta P = 2.7 \times 10^{-3}$  Pa) was monitored by the vacuum gauge of the chamber. The pressure of  $\text{N}_2$  buffer gas in the ion drift tube was  $P_{\text{DT}} = 0.20$  Torr. The blue curve is Gaussian functions for fitting the experimental plots (black circles).
